# Supplementary material for: Drug-related hepatotoxicity risk in elderly patients with atrial fibrillation: insights from the nationwide Italian START registry
Source: Springer Nature journal article supplement (doi:10.1038/s41598-025-28502-8), 2025-12-31
Supplement: MOESM1 [file 41598_2025_28502_MOESM1_ESM.docx]

**Drug-related hepatotoxicity risk in elderly patients with atrial fibrillation: insights from the nationwide Italian START registry**

**Correspondence to:**

Prof. Daniele Pastori, MD, PhD, FESC.
Department of Medical and Cardiovascular Sciences, Sapienza University of Rome, Rome, Italy.
Email: [daniele.pastori@uniroma1.it](mailto:daniele.pastori@uniroma1.it)
ORCID: 0000-0001-6357-5213

**Supplementary Materials**

**Supplementary Table 1: Livertox Classes Description and Level of Evidence**

**Supplementary Table 2: Livertox classification of administered drugs**

**Supplementary Table 3: Most hepatotoxic drugs (Livertox A and A [HD]) used in different subpopulations**

**Supplementary Table 4: Logistic Regression Analysis for the Association of LiverTox A drugs use with increased FIB-4 score (>3.25)**

**Supplementary Table 5: Association of top 25 most prescribed drugs use with increased FIB-4 score (>3.25)**

**Supplementary Table 1: Livertox Classes Description and Level of Evidence**

| **Livertox Class** | **Description** | **Strength of evidence** |
| --- | --- | --- |
| **A** | The drug is extensively documented and recognized for causing either direct or idiosyncratic liver injury, with a specific pattern. | Over 50 cases, including case series, have been rep |
| **B** | The drug is known or highly likely to cause idiosyncratic liver injury and has a specific pattern. | Between 12 and 50 cases, including small case series, have been reported. |
| **C** | The drug is probably associated with idiosyncratic liver injury, but reports are uncommon, and no specific pattern is identified. | Fewer than 12 cases have been reported, with no significant case series. |
| **D** | The drug can only be said to be a possible hepatotoxin and a rare cause of liver injury. | Only single case reports exist, with fewer than 3 cases in the literature, lacking a specific pattern and with questionable causality |
| **E** | Despite widespread use, there is no evidence that the drug causes liver injury. | Single case reports may exist but are largely unconvincing |
| **E*** | The drug is suspected of potentially causing liver injury or idiosyncratic acute liver injury. | No convincing cases are documented in the medical literature, though some reports exist in regulatory filings or large clinical studies, but without detailed causality assessments. |
| **X** | The risk of liver injury is unknown for recently introduced or rarely used drugs. | - |
| **A [HD]**  **B [HD]** | The drug causes liver injury only in high doses, such as in cases of overdose. These are typically direct toxins, and do not cause injury at normal doses (e.g., aspirin, acetaminophen, niacin, vitamin A). They are labeled as [HD] following categories A, B, C, or D. | - |
| **NS** | Livertox Class is not listed in NIH database for this drug | - |

Adapted from <https://www.ncbi.nlm.nih.gov/books/NBK548392/>

**Supplementary Table 2: Livertox classification of administered drugs**

| **Livertox Class** | **Drugs** |
| --- | --- |
| **A** | allopurinol, amiodarone, atorvastatin, azathioprine, carbamazepine, chlorpromazine, diclofenac, efavirenz, estradiol, ibuprofen, interferon, levofloxacin, megestrol, methimazole, methotrexate, nimesulide, phenytoin, rifampin, rosuvastatin, simvastatin, sulfamethoxazole, sulfasalazine, ticlopidine, valproate |
| **A [HD]** | acetaminophen, aspirin, insulin, methylprednisolone |
| **B** | acarbose, amitriptyline, bicalutamide, captopril, celecoxib, ciprofloxacin, clopidogrel, cyclophosphamide, cyproterone, duloxetine, enalapril, esomeprazole, etanercept, fluvastatin, haloperidol, imatinib, lamotrigine, leflunomide, lisinopril, lovastatin, metformin, montelukast, moxifloxacin, naproxen, nifedipine, olanzapine, omeprazole, paroxetine, phenobarbital, pravastatin, propafenone, quetiapine, ranitidine, rivaroxaban, sertraline, tamoxifen, trazodone, venlafaxine, verapamil |
| **B [HD]** | buprenorphine |
| **C** | alendronate, alfuzosin, amlodipine, anastrozole, bupropion, candesartan, cefixime, cetirizine, citalopram, cyclosporine, diltiazem, dronedarone, escitalopram, exemestane, ezetimibe, febuxostat, flecainide, fluoxetine, gabapentin, glecaprevir, glimepiride, glipizide, hydrochlorothiazide, hydroxychloroquine, hydroxyurea, indomethacin, irbesartan, lansoprazole, lenalidomide, levetiracetam, levocetirizine, losartan, metoclopramide, mexiletine, mirtazapine, oxcarbazepine, pantoprazole, pibrentasvir, pioglitazone, pregabalin, ramipril, riluzole, risperidone, ritonavir, sildenafil, sirolimus, tacrolimus, tenofovir, tibolone, topiramate, trimethoprim, warfarin, zoledronic acid |
| **D** | acetazolamide, acyclovir, alprazolam, amiloride, apixaban, asenapine, atazanavir, atenolol, baclofen, benazepril, bromocriptine, carvedilol, chlorambucil, chloroquine, clonazepam, dabigatran, dapagliflozin, donepezil, enoxaparin, flurazepam, fosfomycin, fosinopril, gliclazide, ibandronate, indapamide, lacosamide, letrozole, linagliptin, memantine, metoprolol, mycophenolate, nilotinib, olmesartan, pentoxifylline, perphenazine, prasugrel, rabeprazole, ranolazine, repaglinide, risedronate, rivastigmine, ropinirole, sitagliptin, spironolactone, tamsulosin, ticagrelor, triamterene, trimipramine, ursodiol, valsartan |
| **E** | acetylcysteine, amantadine, aripiprazole, biperiden, bisoprolol, budesonide, carbidopa, cholestyramine, choline, cilostazol, clobazam, clonidine, codeine, colchicine, cortisone, dalteparin, darbepoetin, diazepam, digoxin, dimenhydrinate, dulaglutide, dutasteride, emtricitabine, eplerenone, epoetin alfa, estazolam, exenatide, felodipine, fentanyl, fesoterodine, fexofenadine, finasteride, fludrocortisone, fondaparinux, furosemide, galantamine, hydromorphone, hydroxyzine, isosorbide mononitrate, ivabradine, lamivudine, leuprolide, levodopa, levothyroxine, lidocaine, liraglutide, lithium, lorazepam, methadone, metolazone, mirabegron, misoprostol, nadolol, naloxone, nimodipine, nitroglycerin, omalizumab, oxazepam, oxybutynin, oxycodone, pramipexole, prednisolone, prednisone, propranolol, pyridostigmine, reserpine, rifaximin, romiplostim, s-adenosylmethionine, safinamide, sevelamer, sotalol, sucralfate, telbivudine, terazosin, theophylline, tolterodine, torsemide, tramadol, triptorelin, valganciclovir, zolpidem |
| **E*** | alogliptin, azacitidine, canagliflozin, chlorthalidone, denosumab, doxazosin, edoxaban, empagliflozin, entecavir, eprosartan, everolimus, ketorolac, lanreotide, loratadine, moexipril, nebivolol, perindopril, ponatinib, primidone, quinapril, rasagiline, saxagliptin, selegiline, silodosin, telmisartan, trandolapril, triazolam, trihexyphenidyl, ustekinumab, vortioxetine |
| **X** | amisulpride, cabergoline, domperidone, tapentadol |
| **NS** | acenocumarol, barnidipine, beclomethasone, benserazide, benzidamine, betahistine, bilastine, brimonidine, bromazepam, brotizolam, butizide, canrenoate, chlorphenamine, cilazapril, cinnarizine, citicoline, clebopride, clodronate, clotiapine, clotiazepam, deflazacort, delapril, delorazepam, desamethasone, desmopressin, doxofylline, ebastine, entecapone, etizolam, etoricoxib, fenformin, fitomenadione, givinostat, glibenclamide, gliparide, gliquidone, homofenazine, indobufen, lacidipine, lecarnidipine, levomepromazine, levosulpride, lormetazepam, magaldrate, manidipine, melevodopa, mesalazine, mianserin, molsidomine, nadroparin, neridronate, nicergoline, octatropine, omecantiv, oxatomide, parnaparin, paromomycin, pericyazine, picotamide, piracetam, piretanide, prazepam, promazine, propiverine, propylthiouracile, ranelate, reboxetine, rociverine, rupatadine, sacubitril, somatostatin, tauroursodeoxycholic, tiapride, tiocolchicoside, trimebutine, trimetazidine, vildagliptin, zanedipine, zofenopril |

**Supplementary Table 3: Most hepatotoxic drugs (Livertox A and A [HD]) used in different subpopulations**

| Ischemic Patients  (N = 1379) | | Diabetic Patients (N=1627) | | Hypertensive patients (N=6539) | | Oncological patients (N=1199) | | Renal impairment patients (N=3688) | | Patients over 75 years old (N=6165) | |
| --- | --- | --- | --- | --- | --- | --- | --- | --- | --- | --- | --- |
| Top 10 Most Used Livertox A | | | | | | | | | | | |
| Atorvastatin | 506 (36.7) | Atorvastatin | 369 (22.7) | Atorvastatin | 999 (15.3) | Atorvastatin | 165 (13.8) | Atorvastatin | 508 (13.8) | Atorvastatin | 851 (13.8) |
| Simvastatin | 251 (18.2) | Simvastatin | 249 (15.3) | Amiodarone | 754 (11.5) | Amiodarone | 123 (10.3) | Amiodarone | 449 (12.2) | Amiodarone | 646 (10.5) |
| Amiodarone | 223 (16.2) | Allopurinol | 194 (11.9) | Simvastatin | 713 (10.9) | Simvastatin | 116 (9.7) | Simvastatin | 388 (10.5) | Simvastatin | 627 (10.2) |
| Allopurinol | 173 (12.5) | Amiodarone | 162 (10) | Allopurinol | 564 (8.6) | Allopurinol | 99 (8.3) | Allopurinol | 382 (10.4) | Allopurinol | 505 (8.2) |
| Rosuvastatin | 139 (10.1) | Rosuvastatin | 116 (7.1) | Rosuvastatin | 320 (4.9) | Rosuvastatin | 56 (4.7) | Rosuvastatin | 162 (4.4) | Rosuvastatin | 269 (4.4) |
| Ticlopidine | 33 (2.4) | Ticlopidine | 31 (1.9) | Ticlopidine | 101 (1.5) | Ticlopidine | 16 (1.3) | Methimazole | 64 (1.7) | Ticlopidine | 98 (1.6) |
| Methimazole | 18 (1.3) | Methimazole | 25 (1.5) | Methimazole | 99 (1.5) | Methimazole | 12 (1.0) | Ticlopidine | 62 (1.7) | Methimazole | 85 (1.4) |
| Valproate | 10 (0.7) | Methotrexate | 7 (0.4) | Carbamazepine | 22 (0.3) | Valproate | 7 (0.6) | Carbamazepine | 14 (0.4) | Carbamazepine | 22 (0.4) |
| Carbamazepine | 5 (0.4) | Valproate | 6 (0.4) | Valproate | 21 (0.3) | Carbamazepine | 5 (0.4) | Valproate | 11 (0.3) | Valproate | 18 (0.3) |
| Methotrexate | 4 (0.3) | Carbamazepine | 5 (0.3) | Methotrexate | 17 (0.3) | Ibuprofen | 5 (0.4) | Ibuprofen | 8 (0.2) | Ibuprofen | 15 (0.2) |
| Top 4 most used Livertox A [HD] | | | | | | | | | | | |
| Aspirin | 640 (46.4) | Aspirin | 461 (28.3) | Aspirin | 1565 (23.9) | Aspirin | 260 (21.7) | Aspirin | 850 (23) | Aspirin | 1394 (22.6) |
| Insulin | 114 (8.3) | Insulin | 306 (18.8) | Insulin | 277 (4.2) | Insulin | 47 (3.9) | Insulin | 168 (4.6) | Insulin | 227 (3.7) |
| Methylprednisolone | 20 (1.5) | Acetaminophen | 15 (0.9) | Acetaminophen | 106 (1.6) | Acetaminophen | 19 (1.6) | Acetaminophen | 66 (1.8) | Acetaminophen | 103 (1.7) |
| Acetaminophen | 13 (0.9) | Methylprednisolone | 13 (0.8) | Methylprednisolone | 82 (1.3) | Methylprednisolone | 15 (1.3) | Methylprednisolone | 47 (1.3) | Methylprednisolone | 70 (1.1) |

**Supplementary Table 4: Logistic Regression Analysis for the Association of LiverTox A drugs use with increased FIB-4 score (>3.25)**

| LiverTox A drug | N Patients (%) | Univariable | | | Multivariable* | | |
| --- | --- | --- | --- | --- | --- | --- | --- |
|  |  | **OR** | **95% CI** | **p-value** | **OR** | **95% CI** | **p-value** |
| Atorvastatin | 1128 (13.73) | 0.92 | 0.72, 1.17 | 0.503 | 0.94 | 0.73, 1.20 | 0.642 |
| Amiodarone | 925 (11.26) | 1.05 | 0.82, 1.34 | 0.674 | 1.03 | 0.80, 1.32 | 0.808 |
| Simvastatin | 807 (9.82) | **0.64** | **0.46, 0.87** | **0.007** | **0.66** | **0.47, 0.90** | **0.012** |
| Allopurinol | 626 (7.62) | 1.21 | 0.89, 1.61 | 0.199 | 1.06 | 0.77, 1.42 | 0.725 |
| Rosuvastatin | 358 (4.36) | 0.89 | 0.58, 1.32 | 0.588 | 0.90 | 0.58, 1.33 | 0.609 |
| Methimazole | 118 (1.44) | 0.67 | 0.28, 1.34 | 0.301 | 0.69 | 0.29, 1.39 | 0.341 |
| Ticlopidine | 113 (1.38) | 0.54 | 0.19, 1.20 | 0.177 | 0.51 | 0.18, 1.15 | 0.150 |
| Valproate | 30 (0.37) | 1.45 | 0.34, 4.27 | 0.550 | 1.48 | 0.34, 4.44 | 0.537 |
| Carbamazepine | 28 (0.34) | 0.83 | 0.13, 2.84 | 0.806 | 0.88 | 0.14, 3.01 | 0.862 |
| Methotrexate | 23 (0.28) | 0.57 | 0.03, 2.81 | 0.589 | 0.75 | 0.04, 3.77 | 0.781 |
| Ibuprofen | 19 (0.23) | 0.71 | 0.04, 3.55 | 0.737 | 0.57 | 0.03, 3.09 | 0.604 |
| Phenytoin | 13 (0.16) | 0.83 | 0.05, 4.30 | 0.862 | 0.90 | 0.05, 4.76 | 0.924 |
| Azathioprine | 10 (0.12) | 4.60 | 0.64, 23.60 | 0.078 | 5.58 | 0.76, 29.20 | 0.050 |
| Diclofenac | 7 (0.09) | 1.84 | 0.10, 11.40 | 0.579 | 1.88 | 0.10, 12.20 | 0.571 |
| Levofloxacin | 6 (0.07) | 1.84 | 0.10, 11.40 | 0.579 | 2.43 | 0.12, 16.70 | 0.429 |

OR = Odds Ratio, CI = Confidence Interval. Only drugs taken by at least 5 patients were considered. *Adjusted for CHA₂DS₂-VASc score, creatinine clearance, body mass index, and the presence of cirrhosis with esophageal varices.

**Supplementary Table 5:** **Association of top 25 most prescribed drugs use with increased FIB-4 score (>3.25)**

| Drug | LiverTox Score | N Patients (%) | Univariable | | | Multivariable* | | |
| --- | --- | --- | --- | --- | --- | --- | --- | --- |
|  |  |  | **OR** | **95% CI** | **p-value** | **OR** | **95% CI** | **p-value** |
| Warfarin *(vs DOAC)* | C | 4712 (57.36) | **1.27** | **1.07, 1.51** | **0.007** | **1.19** | **1.00, 1.42** | **0.048** |
| Bisoprolol | E | 2574 (31.33) | 1.03 | 0.86, 1.23 | 0.725 | 0.97 | 0.81, 1.16 | 0.737 |
| Furosemide | E | 2153 (26.21) | **1.34** | **1.12, 1.60** | **0.001** | **1.23** | **1.01, 1.48** | **0.035** |
| Aspirin | A [HD] | 1792 (21.81) | 1.12 | 0.92, 1.36 | 0.259 | 1.11 | 0.91, 1.36 | 0.299 |
| Ramipril | C | 1431 (17.42) | 1.00 | 0.80, 1.23 | 0.974 | 1.02 | 0.81, 1.27 | 0.864 |
| Apixaban | D | 1145 (13.94) | 0.81 | 0.62, 1.03 | 0.093 | 0.78 | 0.60, 1.00 | 0.056 |
| Atorvastatin | A | 1128 (13.73) | 0.92 | 0.72, 1.17 | 0.503 | 0.94 | 0.73, 1.20 | 0.642 |
| Pantoprazole | C | 1086 (13.22) | **1.36** | **1.09, 1.70** | **0.006** | 1.22 | 0.97, 1.53 | 0.087 |
| Hydrochlorothiazide | C | 1049 (12.77) | 0.97 | 0.76, 1.24 | 0.832 | 1.01 | 0.79, 1.29 | 0.917 |
| Lansoprazole | C | 1034 (12.59) | 1.12 | 0.88, 1.42 | 0.349 | 1.10 | 0.85, 1.39 | 0.464 |
| Rivaroxaban | B | 1000 (12.17) | 0.80 | 0.61, 1.03 | 0.092 | 0.82 | 0.62, 1.07 | 0.154 |
| Amlodipine | C | 994 (12.1) | 0.86 | 0.66, 1.11 | 0.252 | 0.80 | 0.61, 1.04 | 0.106 |
| Dabigatran | D | 926 (11.27) | 0.76 | 0.57, 1.01 | 0.063 | 0.95 | 0.70, 1.26 | 0.723 |
| Amiodarone | A | 925 (11.26) | 1.05 | 0.82, 1.34 | 0.674 | 1.03 | 0.80, 1.32 | 0.808 |
| Simvastatin | A | 807 (9.82) | **0.64** | **0.46, 0.87** | **0.007** | **0.66** | **0.47, 0.90** | **0.012** |
| Omeprazole | B | 734 (8.93) | 0.90 | 0.67, 1.18 | 0.450 | 0.82 | 0.61, 1.07 | 0.160 |
| Metformin | B | 708 (8.62) | 0.78 | 0.56, 1.05 | 0.111 | 0.90 | 0.65, 1.24 | 0.545 |
| Digoxin | E | 705 (8.58) | 0.99 | 0.73, 1.31 | 0.931 | 0.94 | 0.70, 1.25 | 0.695 |
| Allopurinol | A | 626 (7.62) | 1.21 | 0.89, 1.61 | 0.199 | 1.06 | 0.77, 1.42 | 0.725 |
| Canrenoate | NS | 620 (7.55) | **1.57** | **1.20, 2.04** | **<0.001** | **1.48** | **1.12, 1.93** | **0.005** |
| Levothyroxine | E | 580 (7.06) | 1.02 | 0.73, 1.39 | 0.897 | 0.96 | 0.68, 1.32 | 0.803 |
| Valsartan | D | 541 (6.59) | 1.06 | 0.76, 1.44 | 0.743 | 1.00 | 0.71, 1.38 | 0.992 |
| Flecainide | C | 425 (5.17) | **0.43** | **0.25, 0.68** | **<0.001** | **0.46** | **0.27, 0.73** | **0.002** |
| Carvedilol | D | 415 (5.05) | 0.99 | 0.68, 1.40 | 0.960 | 0.99 | 0.68, 1.41 | 0.976 |
| Irbesartan | C | 411 (5) | 0.83 | 0.54, 1.22 | 0.364 | 0.84 | 0.54, 1.23 | 0.389 |

DOAC: Direct Oral Anticoagulant, OR = Odds Ratio, CI = Confidence Interval. *Adjusted for CHA₂DS₂-VASc score, creatinine clearance, body mass index, and the presence of cirrhosis with esophageal varices.
